# Supplementary material for: Aqueous extract of Cordyceps sinensis potentiates the antitumor effect of DDP and attenuates therapy-associated toxicity in non-small cell lung cancer via IκBα/NFκB and AKT/MMP2/MMP9 pathways
Source: Royal Society of Chemistry journal article supplement (doi:10.1039/c7ra04716a), 2017-01-01
Supplement: c7ra04716a1.pdf [file c7ra04716a1.pdf]

**Aqueous extract of *Cordyceps sinensis* potentiates the antitumor effect of DDP and attenuates therapy-associated toxicity in non-small cell lung cancer via I $\kappa$ B $\alpha$ /NF $\kappa$ B and AKT/MMP2/MMP9 pathways**

Xiaowei Huo<sup>1</sup>, Chenqi Liu<sup>1,2</sup>, Xuelian Bai<sup>1,2</sup>, Wenjia Li<sup>3</sup>, Jing Li<sup>3</sup>, Xuefeng Hu<sup>3</sup>, Li Cao<sup>1\*</sup>

**Affiliation**

<sup>1</sup>*Institute of Medicinal Plant Development, Chinese Academy of Medical Sciences and Peking Union Medical College, Beijing 100193, China*

<sup>2</sup>*Research Center on Life Sciences and Environmental Sciences, Harbin University of Commerce, Harbin 150076, China*

<sup>3</sup>*Key Laboratory of State Administration of Traditional Chinese Medicine, Sunshine Lake Pharma Co., LTD, Dongguan, 523850, China*

---

**Supplementary Table S1.** The content of polysaccharide in AECS1 and AECS2.

| <b>sample</b> | <b>The content of polysaccharide(mg/ml)</b> |
|---------------|---------------------------------------------|
| AECS1         | 20.69                                       |
| AECS2         | 31.23                                       |
